# Supplementary material for: Migration Potential of Students and Development of Human Capital
Source: MDPI journal article supplement (doi:10.3390/educsci12050324), 2022-05-05
Supplement: s1 [file s1]

Archive with 1 entries (1 files):
- education-1639394-supplementary.pdf
