# Supplementary material for: Migration Potential of Students and Development of Human Capital
Source: MDPI journal article supplement (doi:10.3390/educsci12050324), 2022-05-05
Supplement: s1 [file s1 › education-1639394-supplementary.pdf]

Ural Federal University  
named after the first President of the Russian Federation B.N. Yeltsin

Hello!

We ask you to take part in a sociological survey, the purpose of which is to study public opinion on the problems of internal and international migration. To participate, you need to fill out a questionnaire (filling in the questionnaire will take 15 minutes of your time). **Participation in the study is anonymous, and the data collected will be used in aggregate form for research purposes only.**

Thank you in advance for your participation!

1. What locality do you live in?

---

2. Are migration issues relevant to the region in which you live?

- 1) These questions are of great importance.
- 2) These questions are significant.
- 3) These questions are not significant for the region of my residence.
- 4) I find it difficult to answer.

3. What problems arise due to the appearance of migrants in your region?

(specify multiple answers)

- 1) "Brain drain" i.e., replacement of qualified professionals and graduates
- 2) Arrival of foreign labor
- 3) Influx of unskilled labor
- 4) Illegal migration
- 5) Dissemination of the place of residence and work due to the futility of getting employment
- 6) A rise in lawlessness and criminal groups identified with the personality of immigrants
- 7) Corruption in the migration sphere
- 8) Difficult to answer

4. Does the state's migration policy need to be changed?

- 1) It is not worth setting the appearance of external inhabitants in Russia
- 2) It is necessary

3) Difficult to answer

5. Has your attitude towards migrants changed in the last few years?

(specify ONE answer)

- 1) The relationship remained the same
- 2) The relationships became better than previous
- 3) These relations worsened

6. Migrants from which countries do you sympathize with?

(please select one or more answers)

---

---

7. Migrants from which countries are present in your region?

(check ALL that apply)

---

---

8. In what areas are there positive changes due to the arrival of migrants?

(check ALL that apply)

- 1) Demographics,
- 2) economics,
- 3) Education,
- 4) Culture,
- 5) Other, specify which \_\_\_\_\_

9. In what areas are negative changes observed in connection with the arrival of migrants?

(please select a few of the most appropriate answers)

- 1) environment,
- 2) Unemployment,
- 3) Crime,
- 4) Other, specify which \_\_\_\_\_

10. Are you considering migrating?

- 1) Yes, I am considering the possibility of migrating to another region of Russia,
- 2) Yes, I am considering migrating to another country,
- 3) No, I'm not considering migrating,
- 4) find it difficult to answer.

11. What is the time frame you consider possible for your migration?

- 1) Next year,
- 2) The next 2-3 years,
- 3) The next 3-5 years,
- 4) I do not set a time frame.

12. What reasons do you consider significant when deciding on migration?

- 1) low wages,
- 2) low standard of living in general,
- 3) poor ecology,
- 4) unfavorable climate,
- 5) lack of affordable housing,
- 6) Other \_\_\_\_\_

13. What are your goals when deciding to migrate?

- 1) to find a permanent place of residence,
- 2) a more attractive place to employ,
- 3) career prospects,
- 4) the rest are attracted by recreation and travel,
- 5) to see the world,
- 6) education,
- 7) business development,
- 8) marriage,
- 9) Other \_\_\_\_\_

14. Indicate the source of information about the place where you want to move (specify one or more answers):

- 1) Internet and social networks,
- 2) personal experience,
- 3) friends or acquaintances,
- 4) relatives,
- 5) Other \_\_\_\_\_

15. What are the conditions under which you would reject the idea of migration?

- 1) while ensuring decent wages, an increase in income,
- 2) when solving the issue of employment, ensuring career growth,
- 3) solving the housing problem,
- 4) social and financial support from the authorities,
- 5) development of social infrastructure,
- 6) Other \_\_\_\_\_

16. What needs to be changed in the region? What measures need to be taken so that people, primarily young people, stop leaving?"

- 1) creation of new jobs,
- 2) development of social infrastructure,
- 3) development of culture, sports, entertainment,
- 4) development of innovative sectors of the economy,
- 5) development of industry and agriculture.

17. What measures should be taken for young and qualified migrants to come to the region?

- 1) create new jobs,
- 2) to offer social housing,
- 3) allocate quotas for students,
- 4) improve the work on the compatriots' support program,
- 5) simplify the procedure for obtaining citizenship,

*Finally, a few questions about you:*

18. What is your gender?

1) Female

2) Male

19. What is your age?

1) 14 - 17 years old

2) 17 - 21 years old

3) 22 - 25 years old

4) 26 years and older

20. Your status:

1) Student (undergraduate), not working,

2) Student (specialist), not working,

3) Student (undergraduate), not working,

4) Student (undergraduate), working,

5) Student (specialty), I work,

6) Student (undergraduate), working,

21. Marital status:

1) not married, has a child (children),

2) not married, I live alone,

3) not married, I live with my parents,

4) single, but living with a girlfriend/boyfriend,

5) married, no children,

6) married, has a child/children.

22. Which of the following estimates most accurately describes the financial situation of your family?

1) There is not enough money even to buy food,

2) We have enough money to buy only food,

3) There is enough money to buy food and clothes, larger purchases have to be postponed,

- 4) The purchase of most durable goods (telephone, computer, refrigerator) does not cause difficulties, but we cannot buy an apartment or a car,
- 5) Enough money not to deny yourself anything.

Thank you for participating in the survey!
